# Supplementary material for: A highly transparent and efficient luminescent solar concentrator based on nanosized molybdenum clusters and quantum-cutting perovskite nanocrystals
Source: Royal Society of Chemistry journal article supplement (doi:10.1039/d4tc01520g), 2024-01-01
Supplement: d4tc01520g1.pdf [file d4tc01520g1.pdf]

## **Supporting Information**

# **A Highly Transparent and Efficient Luminescent Solar Concentrator Based on Nanosized Molybdenum Clusters and Quantum-Cutting Perovskite Nanocrystals**

Jun Choi, Sung-Jin Kim\*

Department of Chemistry and Nano Science, Ewha Womans University,

Seoul, 120-750, Korea

\*Email: [sjkim@ewha.ac.kr](mailto:sjkim@ewha.ac.kr)

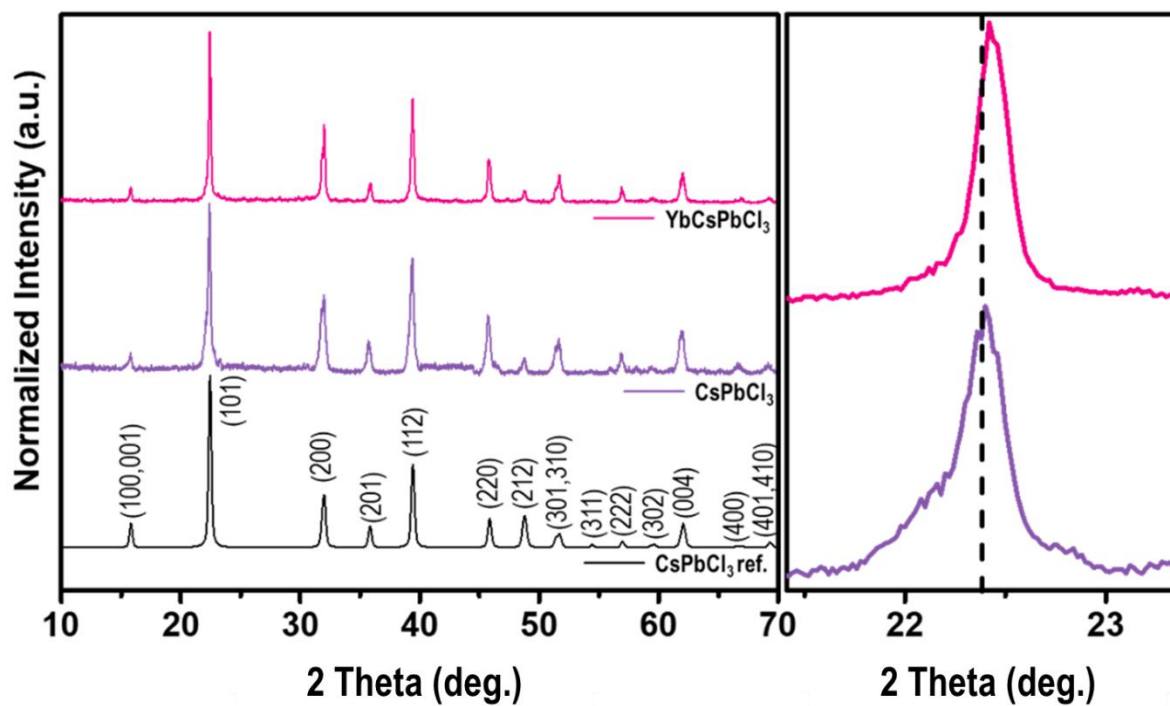

**Figure S1.** XRD patterns of QCP (top, pink) and undoped-CsPbCl<sub>3</sub> (middle, purple). The reference peak of CsPbCl<sub>3</sub> perovskite is also presented (bottom, black)

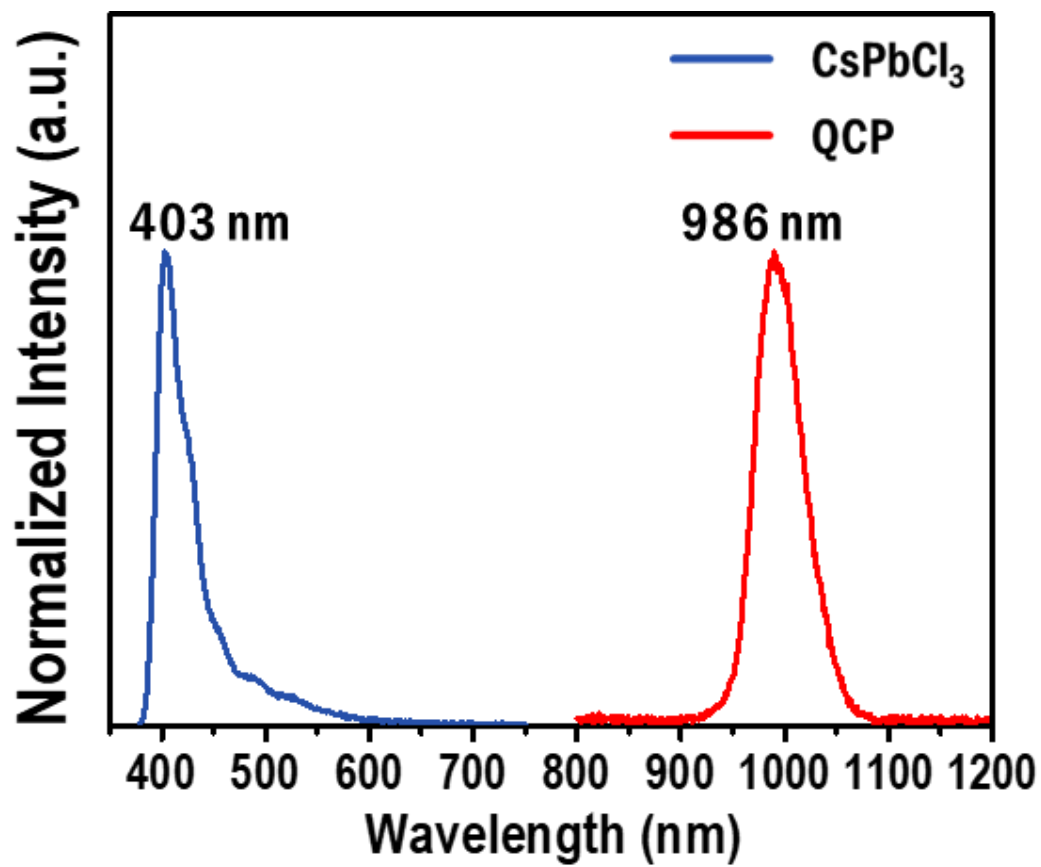

**Figure S2.** Normalized PL spectra of CsPbCl<sub>3</sub> (blue) at 403 nm and QCP (red) at 986 nm excited with a 345 nm light source.

**Table S1.** AVT and color coordinates of the prepared LSCs calculated using the CIE 1931 chromaticity diagram.

| MoC+QCP<br>wt% ratio | AVT  | x      | y      |
|----------------------|------|--------|--------|
| 0.2:0 wt%            | 84.9 | 0.3349 | 0.3352 |
| 0.2:0.04 wt%         | 81.5 | 0.3355 | 0.3356 |
| 0.2:0.1 wt%          | 80.0 | 0.3356 | 0.3357 |
| 0.2:0.2 wt%          | 77.4 | 0.3389 | 0.3394 |
| 0.2:0.45wt%          | 74.6 | 0.3435 | 0.3448 |
| 0.2:0.6 wt%          | 67.9 | 0.3559 | 0.357  |

**Table S2.** Summary of PLQYs for molybdenum clusters, MoC, CsPbCl<sub>3</sub>, QCP, and MoC+QCP with an excitation wavelength of 375 nm.

| Sample No.                                                | QY (%) ( $\lambda_{ex}=375$ nm) |            |             |              |
|-----------------------------------------------------------|---------------------------------|------------|-------------|--------------|
|                                                           | 300-600 nm                      | 600-900 nm | 900-1200 nm | Total QY (%) |
| Cs <sub>2</sub> Mo <sub>6</sub> I <sub>14</sub> (0.2 wt%) | -                               | 1          | -           | 1            |
| MoC (0.2 wt%)                                             | 2                               | 29         | -           | 31           |
| CsPbCl <sub>3</sub> (0.1 wt%)                             | 8.3                             | -          | -           | 8.3          |
| QCP (0.3 wt%)                                             | 0.9                             | -          | 109.9       | 110.8        |
| MoC+QCP (0.2:0.1 wt%)                                     | 3.2                             | 25         | 64.2        | 92.4         |

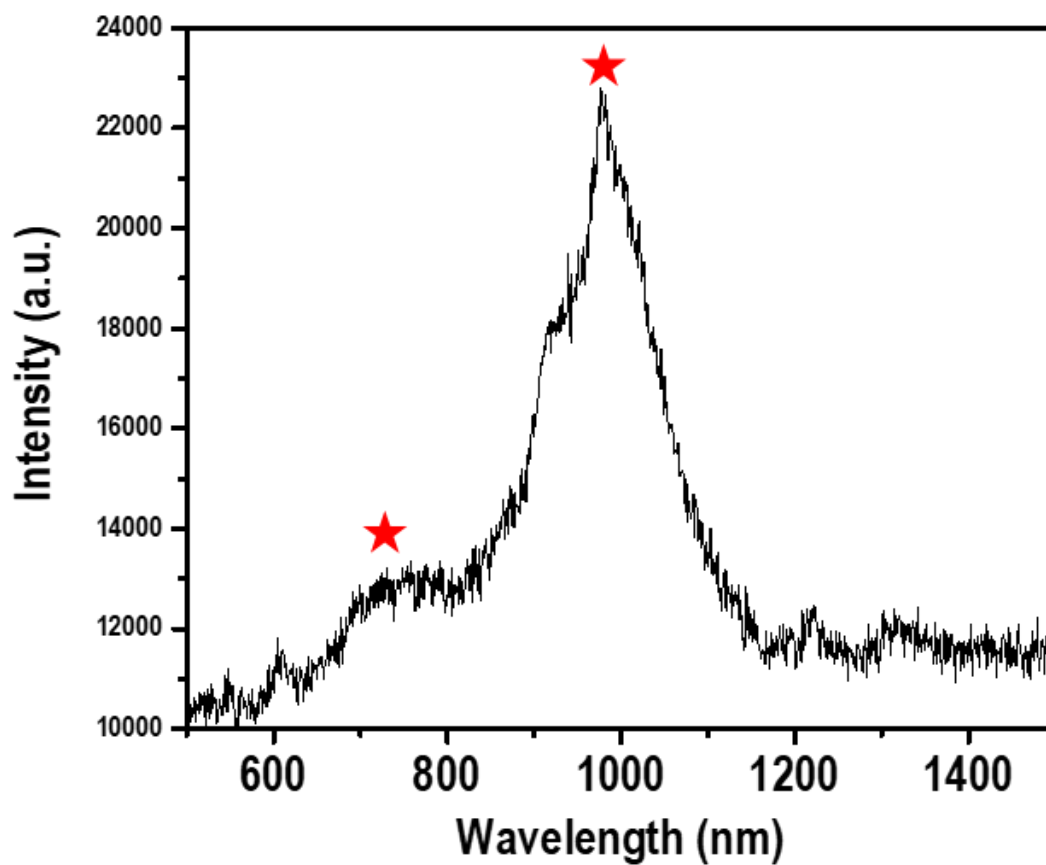

**Figure S3.** PL spectra of MoC+QCP at a ratio of 0.2:0.1 (by wt%) with an excitation wavelength of 375 nm.

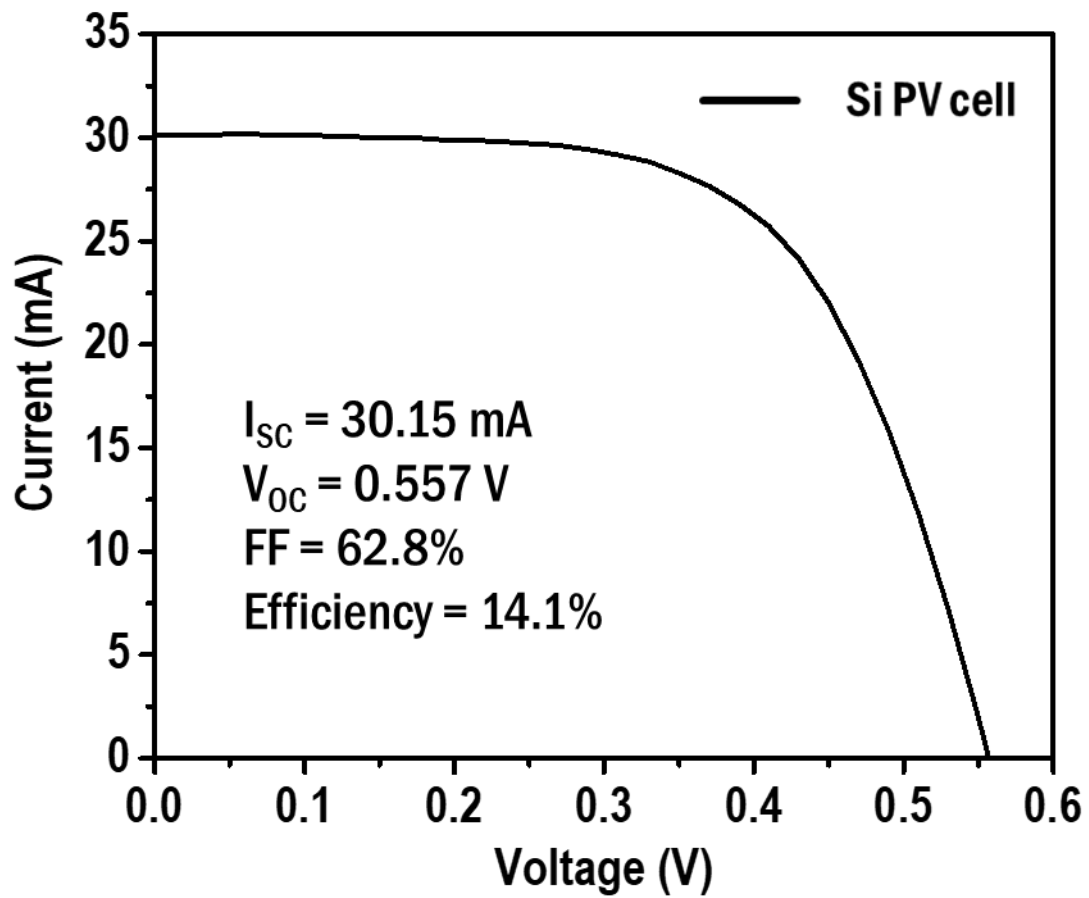

**Figure S4.** Current-voltage ( $I$ - $V$ ) curve of the Si PV cell with an average PCE of  $14 \pm 0.19\%$  (1 sun, AM 1.5 G).

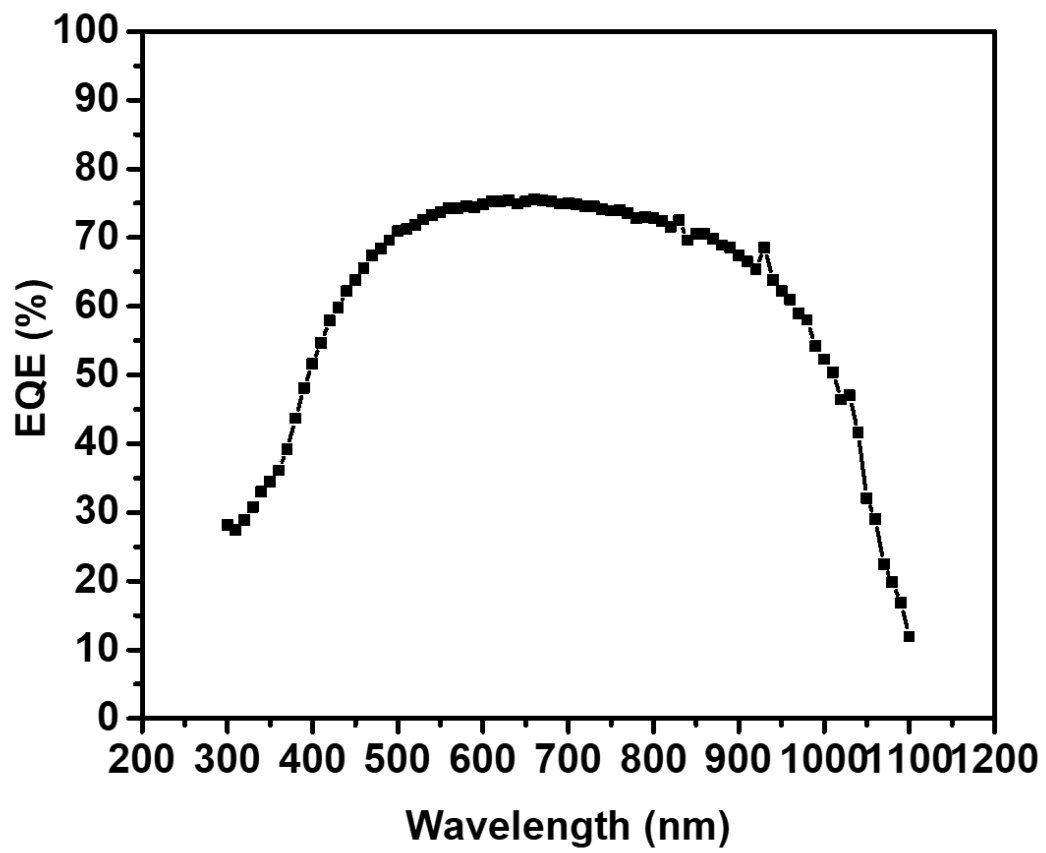

Figure S5. EQE spectra of Si PV cells.



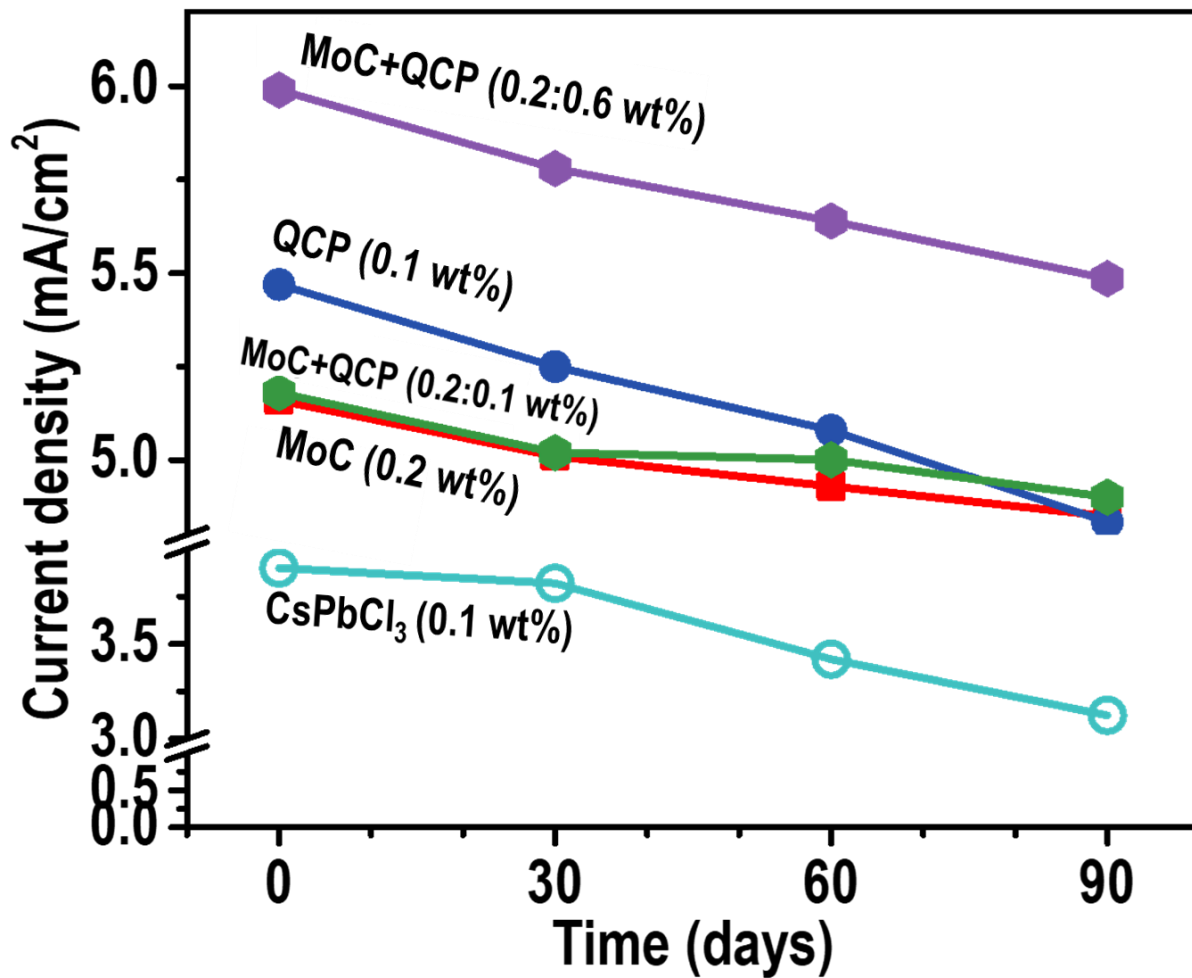

**Figure S6.** Graph of current densities of CsPbCl<sub>3</sub> (cyan circles), MoC (red squares), QCP (blue circles), MoC+QCP (0.2:0.1 wt%) (green hexagons), and MoC+QCP (0.2:0.6 wt%) (purple hexagons) dye-based LSC devices under solar simulator illumination (AM 1.5G) as a function of time up to 90 days.
